# Supplementary material for: Global hotspots of species richness are not congruent with endemism or threat
Source: Springer Nature journal article supplement (doi:10.1038/nature03850), 2005-08-01
Supplement: 41586_2005_BFnature03850_MOESM1_ESM.pdf [file 41586_2005_BFnature03850_MOESM1_ESM.pdf]

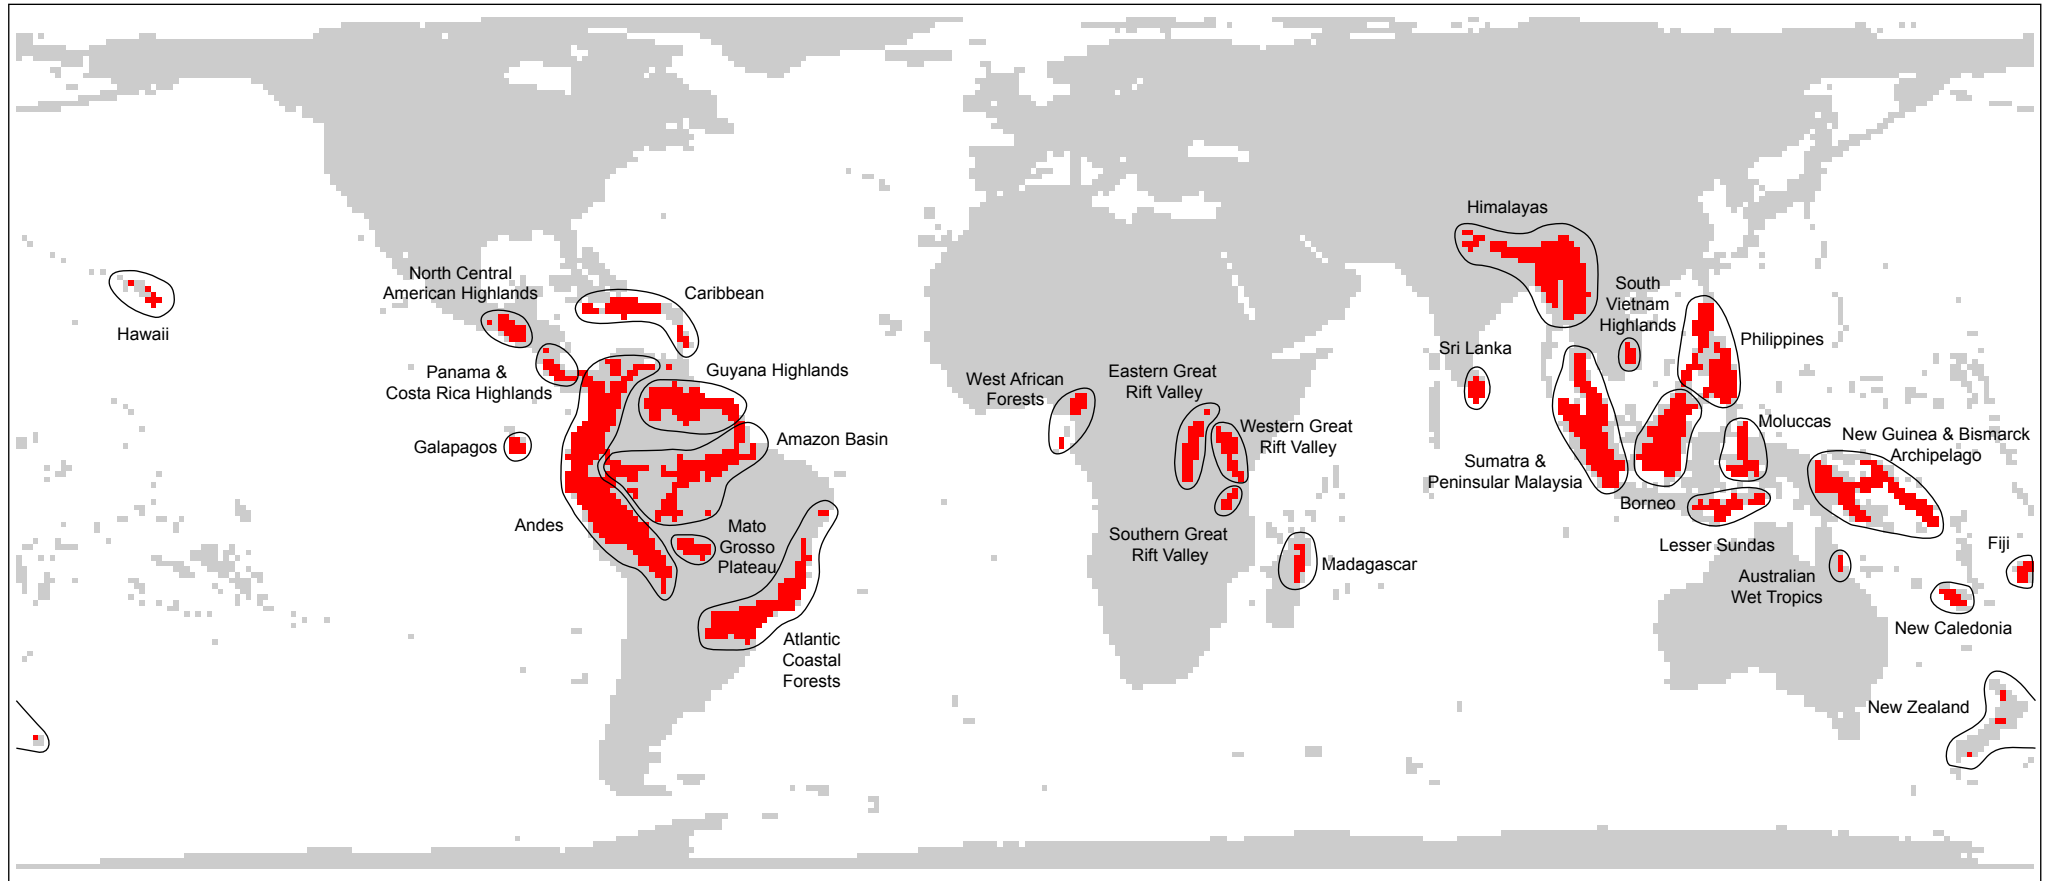

Supplementary Figure 1. Union map of hotspots of overall, threatened and endemic species richness, showing the aggregation into biogeographic regions. For each measure, hotspots are defined as the top 2.5% of grid cells in terms of richness.
